# Supplementary material
Source: HighWire-hosted journal article supplement (https://erj.ersjournals.com/content/57/4/2100224)
Supplement: inline-supplementary-material-1 [file inline-supplementary-material-1.pdf]

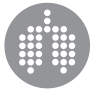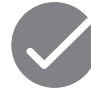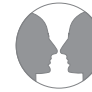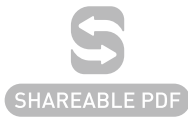

# Corticosteroids in COVID-19: one size does not fit all

Athena Gogali, Chris Kyriakopoulos  and Konstantinos Kostikas 

**Affiliation:** Respiratory Medicine Dept, University Hospital of Ioannina, Ioannina, Greece.

**Correspondence:** Konstantinos Kostikas, University of Ioannina, Respiratory Medicine Dept, University Hospital of Ioannina, Leoforos Stavrou Niarchou, Ioannina 45100, Greece. E-mail: [ktkostikas@gmail.com](mailto:ktkostikas@gmail.com)

 @ERSpublications

**Organising pneumonia and acute fibrinous and organising pneumonia have been reported as the predominant patterns in pathological samples from COVID-19 patients. Critically ill COVID-19 patients may benefit even more from higher corticosteroid doses.** <https://bit.ly/3timqPM>

**Cite this article as:** Gogali A, Kyriakopoulos C, Kostikas K. Corticosteroids in COVID-19: one size does not fit all. *Eur Respir J* 2021; 57: 2100224 [<https://doi.org/10.1183/13993003.00224-2021>].

This single-page version can be shared freely online.

*To the Editor:*

EDALATIFARD *et al.* [1], in a single-blind randomised controlled clinical trial, showed that methylprednisolone pulse administration (250 mg per day intravenously for 3 days) to hospitalised, not intubated patients with severe coronavirus disease 2019 (COVID-19), significantly improved survival and duration of recovery compared to standard care; the effect was more prominent in patients receiving noninvasive ventilation and reservoir mask support.
